# Supplementary material for: Novel polymorphic AluYb8 insertion in the WNK1 gene is associated with blood pressure variation in Europeans
Source: PubMed Central journal article supplement (PMC3298642; doi:10.1002/humu.21508), 2011-04-21
Supplement: humu0032-0806-SD1.pdf [file humu0032-0806-SD1.pdf]

## SUPPORTING INFORMATION

### **Novel polymorphic *AluYb8* insertion in the *WNK1* gene is associated with blood pressure variation in Europeans**

Margus Putku<sup>1</sup>, Katrin Kepp<sup>1</sup>, Elin Org<sup>1</sup>, Siim Sõber<sup>1</sup>, David Comas<sup>2</sup>, Margus Viigimaa<sup>3,4</sup>, Gudrun Veldre<sup>1,5</sup>, Peeter Juhanson<sup>1</sup>, Pille Hallast<sup>1</sup>, Neeme Tõnisson<sup>1</sup>, HYPEST†, Sue Shaw-Hawkins<sup>6</sup>, Mark J. Caulfield<sup>6</sup>, BRIGHT†, Elza Khusnutdinova<sup>7</sup>, Viktor Kožich<sup>8</sup>, Patricia B. Munroe<sup>6</sup>, Maris Laan<sup>1\*</sup>

<sup>1</sup>Human Molecular Genetics Research Group, Institute of Molecular and Cell Biology, University of Tartu, Tartu, Estonia

<sup>2</sup>Institute of Evolutionary Biology (UPF-CSIC), CEXS-UPF-PRBB, Universitat Pompeu Fabra, Barcelona, Spain

<sup>3</sup>Centre of Cardiology, North Estonia Medical Centre, Tallinn, Estonia

<sup>4</sup>Tallinn University of Technology, Department of Biomedical Engineering, Chair of Medical Physics, Tallinn, Estonia

<sup>5</sup>Department of Cardiology, University of Tartu, Tartu, Estonia

<sup>6</sup>Clinical Pharmacology and The Genome Centre, William Harvey Research Institute, Barts and The London School of Medicine and Dentistry, Queen Mary University of London, London EC1M 6BQ

<sup>7</sup>Institute of Biochemistry and Genetics, Ufa Science Center, Russian Academy of Sciences, Ufa, Bashkortostan, Russia

<sup>8</sup>Institute of Inherited Metabolic Diseases, Charles University – First Faculty of Medicine, Prague, Czech Republic

†HYPertension in ESTonia (HYPEST), the British Genetics of Hypertension (BRIGHT); additional BRIGHT consortium contributors are given in Supp. Text S1.

\* Correspondence and reprint requests to: Maris Laan, Institute of Molecular and Cell Biology, University of Tartu, Riia 23, 51010 Tartu, Estonia; Telephone: +372-7375008, Fax: +372-7420286, Email: [maris.laan@ut.ee](mailto:maris.laan@ut.ee)

#### **LIST OF SUPPORTING INFORMATION:**

**Supp. Text S1.** List of additional BRIGHT consortium contributors, additional information for Materials and Methods

**Supp. Figure S1.** PCR amplification of the locus for *WNK1* intron 10 *AluYb8* insertion in eleven chimpanzees as resolved by agarose gel (3%) electrophoresis.

**Supp. Figure S2.** Sequence alignment of the *WNK1* genomic fragment spanning from exon 10 to exon 11.

**Supp. Figure S3.** Global map of the allele frequencies of the *WNK1* *AluYb8* insertion in studied human population samples from Eurasia and Africa.

**Supp. Figure S4.** Amino acid alignment of the *WNK1* exon 13 among vertebrates.

**Supp. Table S1.** Characteristics of the *WNK1* (12p13.33; Ensembl ID: ENSG00000060237) and *WNK4* (17q21.31; Ensembl ID: ENSG00000126562) non-coding regions selected for polymorphism screening.

**Supp. Table S2.** Polymorphism screening primers for DHPLC

**Supp. Table S3.** Polymorphism screening primers for DGGE

**Supp. Table S4.** Sequences of primers and probes used in PCR and RT-PCR

**Supp. Table S5.** Characteristics of the individuals used for *WNK1* expression profiling in leucocytes

**Supp. Table S6.** Polymorphisms detected in screened conserved non-coding regions of human *WNK1* and *WNK4* genes

**Supp. Table S7.** Allele frequencies of the *WNK1 AluYb8* insertion in general human population samples

**Supp. Table S8.** Association testing of the *WNK1* intron 10 *AluYb8* with hypertension

**Supp. Table S9.** Linkage disequilibrium ( $r^2$ ) between the *WNK1 AluYb8* and common SNPs in the *WNK1* gene previously reported in the BRIGHT study

**Supp. Table S10.** Association of the *WNK1 AluYb8* and SNPs rs11064527, rs12816718, rs956868 with blood pressure in the BRIGHT

**Supp. Text S1. List of additional BRIGHT consortium contributors, additional information for Materials and Methods**

***Additional MRC the British Genetics of Hypertension (BRIGHT) study consortium members:***

Toby Johnson, Stephen J. Newhouse, Philip J. Howard, Abiodun Onipinla, Anna Dominiczak, Nilesh J. Samani, Martin Farrall, Morris Brown, Mark Lathrop, John Connell

***Affiliations:***

Clinical Pharmacology and Barts and the London Genome Centre, William Harvey Research Institute, Barts and the London School of Medicine, Queen Mary University of London, London, UK (T.J., S.J.N., P.J.H, A. O.); BHF Glasgow Cardiovascular Research Centre, Division of Cardiovascular and Medical Sciences, University of Glasgow, Western Infirmary, Glasgow, UK (A.D.); Department of Cardiovascular Sciences, University of Leicester, Glenfield Hospital, Leicester, UK (N.S.); Department of Cardiovascular Medicine, University of Oxford, Wellcome Trust Centre for Human Genetics, Oxford, UK (M.F.); Clinical Pharmacology and the Cambridge Institute of Medical Research, University of Cambridge, Addenbrooke's Hospital, Cambridge, UK (M.B.); Centre National de Genotypage, Evry, France (M.L.); University of Dundee, Medical School, Ninewells Hospital and Medical School Dundee, UK (J.C.)

***Details of the design and experimental condition of the DGGE and DHLPC assays***

DGGE primers with GC rich tail at 5' end of one primer of the primer pair were designed with program MELTingeny 1.0.1 using primer design criteria recommended by Ingeny International. Supplementing the 5' end of the reverse primer with a GC clamp (a sequence of 40 G and C deoxynucleotides) allowed the detection of single-base substitutions present in the fragment.

DHPLC primers were designed according to manufacturer recommendations (DHPLC; Wave Technologies Inc. USA) using web-based program Primer3 (3). The calculations of the appropriate melting conditions for each of the selected DHPLC PCR fragments we used web based DHPLC Melt Program (<http://insertion.stanford.edu/melt.html>). The uniqueness of the primer sequence in the human genome were tested and verifying using GenomeTester1.3 (<http://bioinfo.ut.ee/genometester/>). The DGGE and DHPLC primers are given in Supp. Table S1.

Regions targeted for polymorphism screening were amplified by touchdown method using 100 ng genomic DNA, Smart-Taq Hot DNA polymerase (Naxo OÜ, Tartu, Estonia), GeneAmp PCR System 2700 thermal cycler (Applied Biosystems Inc., USA) and amplification conditions described elsewhere (1). DGGE electrophoresis by INGENY PhorU2 system was performed according to the manufacturer's instructions (Ingeny, Goes, Netherlands). Electrophoresis (16-17 hours) was carried out at 58°C, amperage of 40 mA and voltage of 100 V. The DHPLC analysis was performed according to the manufacturer's recommendations (Wave Technologies Inc. USA) using pools consisting of the genomic DNA from three individuals. Individual DNA probes exhibiting unusual pattern in the DGGE analysis or forming a DNA-pool indicative to the presence of a polymorphism in the DHPLC analysis were resequenced to determine the exact changes in the genomic sequence.

### ***Recruitment of individuals to the HYPEST study***

The HYPEST (n=1823) study has been approved by the Ethics Committee on Human Research of University of Tartu, Estonia. All of the study participants are of Eastern European ancestry,

have filled a self-administrated epidemiological questionnaire recording to their past and present health and life-style and have given their written informed consent.

The HYPEST sample collection represents a case-cohort study. Essential hypertension patients were recruited by blood pressure specialists during the patients' ambulatory visits or hospitalization at the North Estonia Medical Center, Centre of Cardiology, or at the Cardiology Clinic, Tartu University Hospital, Estonia. The HYPEST healthy control cohort was recruited from among the long-term blood donors across Estonia. All the included donors had no personal history of cardiovascular diseases and had also never been prescribed any relevant medications.

#### ***Details of the cDNA synthesis protocol***

Total RNA from leucocytes was extracted using LeukoLOCK™ Total RNA Isolation System (Ambion Inc, Austin, Texas, USA) including an optional TURBO™ DNase treatment to degrade genomic DNA. Concentration of extracted RNA was measured with NanoDrop® ND-1000 UV-Vis Spectrophotometer (NanoDrop Technologies, LLC, Wilmington, Delaware, USA).

RNA was reverse transcribed using SuperScript™ III First-Strand Synthesis SuperMix for qRT-PCR (Life Technologies Corporation, Carlsbad, California, USA) in the final volume of 20 µl containing 0,4 µg of RNA, 10 µl of 2X RT Reaction Mix [oligo(dT)<sub>20</sub> (2.5 µM), random hexamers (2.5 ng/µl), 10 mM MgCl<sub>2</sub>, and dNTPs], 2µl of RT Enzyme Mix (includes SuperScript™ III RT and RNaseOUT™) and DEPC-treated water. The reaction mixture was incubated at 25°C for 10 minutes and at 50°C for 30 minutes. Reaction was terminated at 85°C at 5 minutes and chilled on ice. cDNA was treated with 2 U of *E.coli* Rnase H at 37°C for 20 minutes to remove the RNA template from the cDNA:RNA hybrid molecule.

***Detailed conditions of the real-time RT-PCR reactions***

The 20 µl PCR reactions consisted of 2 µl cDNA product 4X dilution, 4 µl of 5X HOT FIREPol® Probe qPCR Mix (Solis BioDyne, Tartu, Estonia) containing HOT FIREPol® DNA Polymerase, 5X Probe qPCR buffer, 15 mM MgCl<sub>2</sub>, dNTPs and 2,5 µM ROX dye, as well as primers and a probe in following concentration: 400 nM forward and reverse primer, 250 nM probe for spliced transcripts or 1 µl of 20X primer-probe mix for transcript including exon 11 (Hs01018312\_m1) and 0.9 µl (ex+11+12 and ex-11-12) or 0.8 µl (ex-11+12) of 20X ready-to-use primer-probe mix for endogenous control *HPRT1*. The PCR protocol was identical in all runs: incubation step at 95°C for 15' followed by 40 two-step amplification cycles (15'' at 95°C; 1' at 60°C).

**References**

Hallast P, Nagirnaja L, Margus T, and Laan M. 2005. Segmental duplications and gene conversion: Human luteinizing hormone/chorionic gonadotropin beta gene cluster. *Genome Res* 15: 1535-1546.

Rozen S, and Skaletsky H. 2000. Primer3 on the WWW for general users and for biologist programmers. *Methods Mol Biol* 132: 365-386.

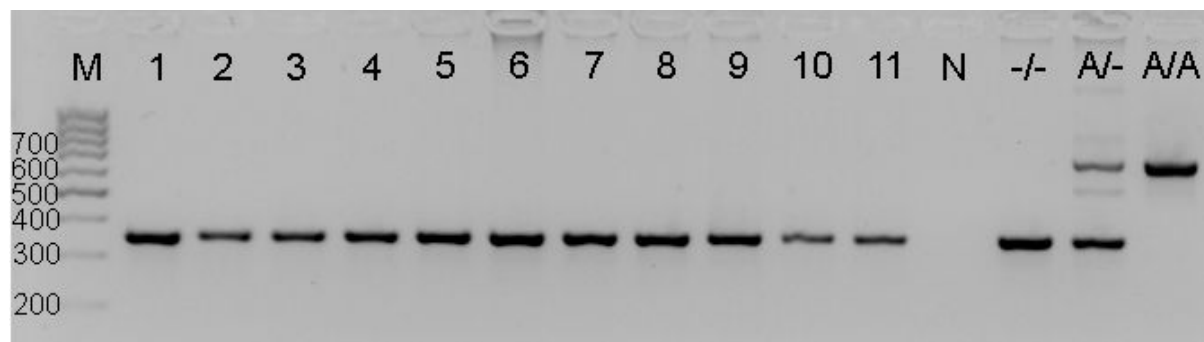

**Supp. Figure S1.** PCR amplification of the locus for *WNK1* intron 10 *AluYb8* insertion in eleven chimpanzees as resolved by agarose gel (3%) electrophoresis. In all analyzed individuals (numbered 1-11) the resulting PCR product corresponded to the wild-type genotype lacking the *WNK1* intron 10 *AluYb8* insertion. Human genomic DNAs representing alternative genotypes were used as positive controls: wild-type genotype without *AluYb8* insertion (-/-, PCR product 353 bp); heterozygous (A/-) and homozygous (A/A, PCR product 660 bp) carriers of the insertion.

N, negative control; M, marker (Fermentas MassRuler™ DNA Ladder, Low Range)



**Supp. Figure S2.** Sequence alignment of the *WNK1* genomic fragment spanning from exon 10 to exon 11. Human chromosomes carrying (Alu +) and not carrying (Alu –) the *AluYb8* insertion are shown in comparison with the respective genomic region in common chimpanzee (*Pan troglodytes*). The sequences of the *WNK1* exons 10 and 11 are shown in blue and the *AluYb8* insertion to human *WNK1* intron 10 in red font. The substitution-based divergence between human wild-type (Alu –) and chimpanzee sequences (excluding species-specific insertion/deletions) is 0%, 0.2% and 1.1% for exon 10 (150 bp), exon 11 (459 bp) and intron 10 (1211 bp), respectively. Sequence alignment was performed using the web-based global alignment program ClustalW2 (<http://www.ebi.ac.uk/Tools/clustalw2/>).

#### EXON 10:

Human Alu (+)

CAGCAGGGAATACAGCAGACAGCCCCCTCCTCAACAGACAGTGCAGTATTCACCTTTCACAG 60

Human Alu (–)

CAGCAGGGAATACAGCAGACAGCCCCCTCCTCAACAGACAGTGCAGTATTCACCTTTCACAG 60

Chimpanzee

CAGCAGGGAATACAGCAGACAGCCCCCTCCTCAACAGACAGTGCAGTATTCACCTTTCACAG 60

Human Alu (+)

ACATCAACCTCCAGTGAGGCCACTACTGCACAGCCAGTGAGTCAACCTCAAGCTCCACAA 120

Human Alu (–)

ACATCAACCTCCAGTGAGGCCACTACTGCACAGCCAGTGAGTCAACCTCAAGCTCCACAA 120

Chimpanzee

ACATCAACCTCCAGTGAGGCCACTACTGCACAGCCAGTGAGTCAACCTCAAGCTCCACAA 120

Human Alu (+)

#### INTRON 10

GTCTTGCCTCAAGTATCAGCTGGAAAACAG GTAAACTTTTTTTTTTTTTTTTAAACAGGTA 180

Human Alu (–)

GTCTTGCCTCAAGTATCAGCTGGAAAACAG GTAAACTTTTTTTTTTTTTTTTAAACAGGTA 180

Chimpanzee

GTCTTGCCTCAAGTATCAGCTGGAAAACAG GTAAACTTTTTTTTTTTTTTTTAAACAGGTA 180

Human Alu (+)

AACTCTTAATTTCTGAAAGGGTGCTAAAAGGGATTTCCATGTAACCTTGCCTTTCATGTG 240

Human Alu (–)

AACTCTTAATTTCTGAAAGGGTGCTAAAAGGGATTTCCATGTAACCTTGCCTTTCATGTG 240

Chimpanzee

AACTCTTAATTTCTGAAAGGGTGCTAAAAGGGATTTCCATGTAACCTTGCCTTTCATGTG 240

Human Alu (+)

GATAGACTTCTACCTTTTCTTCTAAGGGTAACCAACCCTTGAAGTAGGTTAATCTCATTG 300

Human Alu (–)

GATAGACTTCTACCTTTTCTTCTAAGGGTAACCAACCCTTGAAGTAGGTTAATCTCATTG 300

Chimpanzee

GATAGACTTCTACCTTTTCTTCTAAGGGTAACCAACCCTTGAAGTAGGTTAATCTCATTG 300

Human Alu (+)

CAGAAATGAAGTGAAGATCACCTCATTGGTGCATATGCATTATTTAATGTAAATGGGTAC 360

Human Alu (–)

CAGAAATGAAGTGAAGATCACCTCATTGGTGCATATGCATTATTTAATGTAAATGGGTAC 360

Chimpanzee

CAGAAATGAAGTGAAGATCACCTCATTGGTGCATATGCATTATTTAATGTAAATGGGTAC 360

Human Alu (+)  
 GTTACTGACAGCAGTGACAATCCAAAGTTTCACTTCTAGTCTTACCAGTCCAAAATTGAT 420  
 Human Alu (-)  
 GTTACTGACAGCAGTGACAATCCAAAGTTTCACTTCTAGTCTTACCAGTCCAAAATTGAT 420  
 Chimpanzee  
 GTTACTGACAGCAGTGACAATCCAAAGTTTCACTTCTAGTCTTACCAGTCCAAAATCGAT 420

Human Alu (+)  
 GTAACAGGTATTAGAAATAACAGGTAAATAAAGGTGCTCTGGTAACTGAACCTATGACA 480  
 Human Alu (-)  
 GTAACAGGTATTAGAAATAACAGGTAAATAAAGGTGCTCTGGTAACTGAACCTATGACA 480  
 Chimpanzee  
 TTAACAGGTATTAGAAATAACAGGTAAATAAAGGTGCTCTGGTAACTGAACCTATGACA 480

Human Alu (+)  
 TTCCCTAGAATTGTGTCAGCTATGTCTGATATTCTAGGTTTGAAACTATGCTTTATTTTC 540  
 Human Alu (-)  
 TTCCCTAGAATTGTGTCAGCTATGTCTGATATTCTAGGTTTGAAACTATGCTTTATTTTC 540  
 Chimpanzee  
 TTCCCTAGAATTGTGTCAGCTATGTCTGATATTCTAGGTTTGAAACTATGCTTTATTTTC 540

Human Alu (+) *AluYb8 insertion*  
 ATGTAGATTTCTGCACTGTTTACTGTGTGGAATGTTTTTTTTTTTTTTTTTTTTT GAGACG 600  
 Human Alu (-)  
 ATGTAGATTTCTGCACTGTTTACTGTGTGGAATGTTTTTTTTTT----- 583  
 Chimpanzee  
 ATGTAGATTTCTGCACTGTTTACTGTGTGGAATGTTTTTTTTTT----- 584

Human Alu (+)  
GAGTCTCGCTCTGTGCGCCAGGTCGGACTGCGGACTGCAGTGGCGCAATCTCGGCTCACT 660  
 Human Alu (-)  
 -----  
 Chimpanzee  
 -----

Human Alu (+)  
GCAAGCTCCGCTTCCCAGGTTACGCCATTCTCCTGCCTCAGCCTCCCGAGTAGCTGGGA 720  
 Human Alu (-)  
 -----  
 Chimpanzee  
 -----

Human Alu (+)  
CTACAGGCGCCGCCACCGCGCCGGCTAATTTTTTGTATTTTTAGTAGAGACGGGGTTT 780  
 Human Alu (-)  
 -----  
 Chimpanzee  
 -----

## Human Alu (+)

CACTTGTTAGCCAGGATGGTCTCGATCTCCTGACCTCATGATCCACCCGCTCGGCCTC 840

Human Alu (-)

-----  
Chimpanzee  
-----

## Human Alu (+)

CCAAAGTGCTGGGATTACAGGCGTGAGCCACCGCGCCCGGCC TTTTTTTTCTTAAGTAGT 900

Human Alu (-)

----- CTTAAGTAGT 593

Chimpanzee

----- CTTAAGTAGT 594

## Human Alu (+)

CCTCCTAATCACTTGAGAAGTACCCTGTAGAAGGTATGCTTTTCTGAATGACCTTTTTTC 960

Human Alu (-)

CCTCCTAATCACTTGAGAAGTACCCTGTAGAAGGTATGCTTTTCTGAATGACCTTTTTTC 653

Chimpanzee

CCTCCTAATCACTTGAGAAGTACCCTGTAGAAGTTATGCTTTTCTGAATGACCTTTGTTC 654

## Human Alu (+)

AACTTTATTTTTGAGTACTGTTGTGCATGTATGTGCACAGTGTATTGTTACCCTAATATT 1020

Human Alu (-)

AACTTTATTTTTGAGTACTGTTGTGCATGTATGTGCACAGTGTATTGTTACCCTAATATT 713

Chimpanzee

AACTTTATTTTTGAGCACTGTTGTGCATGTATGTGCACAGTGTATTGTTACCCTAATATT 714

## Human Alu (+)

TCATCACATCTGAGATGCTATCAACTTTAAAATGTACCATATTTTATGTACCACATTATC 1080

Human Alu (-)

TCATCACATCTGAGATGCTATCAACTTTAAAATGTACCATATTTTATGTACCACATTATC 773

Chimpanzee

TCATCACATCTGAGATGCTATCAACTTTAAAATGTACCA- - - - - CATTATC 760

## Human Alu (+)

AGTTATAAAGTAGATCCCAATTTCTCACATGTTAAAATGATCAGGTAGTGGAGAGGGATG 1140

Human Alu (-)

AGTTATAAAGTAGATCCCAATTTCTCACATGTTAAAATGATCAGGTAGTGGAGAGGGATG 833

Chimpanzee

AGTTATAAAGTAGATCCCAATTTCTCACATGTTAAAATGGTCAGGTAGTGGAGAGGGATG 820

## Human Alu (+)

ATTGCATCCTAGAATGAGTGAAATATGTGAATTATACCAATTTTTATTGAGCCATGTTGG 1200

Human Alu (-)

ATTGCATCCTAGAATGAGTGAAATATGTGAATTATACCAATTTTTATTGAGCCATGTTGG 893

Chimpanzee

ATTGCATCCTAGAATGAGTGAAATATGTGAATTATACCAATTTTTATTGAGCCATGTTGG 880

## Human Alu (+)

ACTTAAGAATTTTAGAAATAATACGAATGAAATCTTAATTCCACTGGGAAGGAATTCATT 1260

Human Alu (-)

ACTTAAGAATTTTAGAAATAATACGAATGAAATCTTAATTCCACTGGGAAGGAATTCATT 953

Chimpanzee

ACTTAAGAATTTTAGAAATAATATGAATGAAATCTTAATTCCACTGGGAAGGAATTCATT 940

Human Alu (+)

TGAATTTTCAGTAACTACTGTAACAGCAGTCGTAACCTTTAGTGATAGCATTATGGTATATA 1320

Human Alu (-)

TGAATTTTCAGTAACTACTGTAACAGCAGTCGTAACCTTTAGTGATAGCATTATGGTATATA 1013

Chimpanzee

TGAATTTTCAGTAACTACTGTAATAGCAGTCGTAACCTTTAGTGATAGCATTATGGTATATA 1000

Human Alu (+)

AAATATATTCCAATAAAGCTGTAAAAAAAAAAAAA-GCCAACCCCTTGTCTATGGAAGGGTC 1379

Human Alu (-)

AAATATATTCCAATAAAGCTGTAAAAAAAAAAAAA-GCCAACCCCTTGTCTATGGAAGGGTC 1072

Chimpanzee

AAATATATTCCAATAAAGCTGTAAAAAAAAAAAAAAGCCAACCCCTTGTCTATGGAAGGGTC 1060

Human Alu (+)

CTCTTCTATTGCCAAATGCTGAAGCATTAGCAAATATTTCTATGACAAAAGGTGTAGAAC 1439

Human Alu (-)

CTCTTCTATTGCCAAATGCTGAAGCATTAGCAAATATTTCTATGACAAAAGGTGTAGAAC 1132

Chimpanzee

CTCTTCTATTGCCAAATGCTGAAGCATTAGCAAATATTTCTATGACAAAAGGTGTAGAAC 1120

Human Alu (+)

AGTAATAGTCTATTTAGCCTCTTTCTCTCCTGCTCTCCTTTCCATATTTTTATGTGGCAT 1499

Human Alu (-)

AGTAATAGTCTATTTAGCCTCTTTCTCTCCTGCTCTCCTTTCCATATTTCTTATGTGGCAT 1192

Chimpanzee AGTAATAGTCTATTTAGCCTCTTTCTCTCCTGCTCTCCTTTCCATATTTCTTATGTGGCAT  
1180

Human Alu (+)

ATTAACCTAACACTAATGTATGCAGGGTTTTGTTGGTTTGGTGTTTTTTTTTTTTTGTTT 1559

Human Alu (-)

ATTAACCTAACACTAATGTATGCAGGGTTTTGTTGGTTTGGTGTTTTTTTTTTTTT- - GTTT 1250

Chimpanzee

ATTAACCTAACACTAATGTATGCAGGGTTTTGTTGGTTTGGTGTTTTTTTTTGTT- - - TT 1236

Human Alu (+)

GTTTTTTCCTTCTTTTTGGCTAATACATAAATCTTGCTTTTGGCAGCCTTGCTTTTTTTTT 1619

Human Alu (-)

GTTTTTTCCTTCTTTTTGGCTAATACATAAATCTTGCTTTTGGCAGCCTTGCTTTTTTTTT 1310

Chimpanzee GTTTTTTCCTTCTTTTTGGCTAATACATAAATCTTGCTTTTGGCAGCCTTGCTATTTTTT  
1296

Human Alu (+)

**EXON 11**

TTTTTTTTTTTTTTTTAA-GCCTGTCTGTTTTGTTTTCTTTACCTTCCCAG **CTTCCAGT** 1678

Human Alu (-)

TTTTTTTTTTTTTTTTAA-GCCTGTCTGTTTTGTTTTCTTTACCTTCCCAG **CTTCCAGT** 1369

Chimpanzee

TTTTTTTTTTTTTTTTAAAGCCTGTCTGTTTTGTTTTCTTTACCTTCCCAG **CTTCCAGT** 1356

Human Alu (+)

**TTCCCAGCCAGTACCAACTATCCAAGGCGAACCTCAGATCCCAGTTGCGACACAACCCTC** 1738

Human Alu (-)

**TTCCCAGCCAGTACCAACTATCCAAGGCGAACCTCAGATCCCAGTTGCGACACAACCCTC** 1429

Chimpanzee

**TTCCCAGCCAGTACCAACTATCCAAGGCGAACCTCAGATCCCAGTTGCGACACAACCCTC** 1416

Human Alu (+)

GGTTGTTCCAGTCCACTCTGGTGCTCATTTTCCTTCCAGTGGGACAGCCGCTCCCTACTCC 1798

Human Alu (-)

GGTTGTTCCAGTCCACTCTGGTGCTCATTTTCCTTCCAGTGGGACAGCCGCTCCCTACTCC 1489

Chimpanzee

GGTTGTTCCAGTCCACTCTGGTGCTCATTTTCCTTCCAGTGGGACAGCCGCTCCCTACTCC 1476

Human Alu (+)

CTTGCTCCCTCAGTACCCTGTCTCTCAGATTCCCATATCAACTCCTCATGTGTCTACGGC 1858

Human Alu (-)

CTTGCTCCCTCAGTACCCTGTCTCTCAGATTCCCATATCAACTCCTCATGTGTCTACGGC 1549

Chimpanzee

CTTGCTCCCTCAGTACCCTGTCTCTCAAATTCCCATATCAACTCCTCATGTGTCTACGGC 1536

Human Alu (+)

TCAGACAGGTTTCTCATCCCTTCCCATCACAATGGCAGCTGGCATTACTCAGCCTCTGCT 1918

Human Alu (-)

TCAGACAGGTTTCTCATCCCTTCCCATCACAATGGCAGCTGGCATTACTCAGCCTCTGCT 1609

Chimpanzee

TCAGACAGGTTTCTCATCCCTTCCCATCACAATGGCAGCTGGCATTACTCAGCCTCTGCT 1596

Human Alu (+)

CACGTTGGCTTCATCTGCTACAACAGCTGCGATCCCGGGGGTATCAACTGTGGTTCTAG 1978

Human Alu (-)

CACGTTGGCTTCATCTGCTACAACAGCTGCGATCCCGGGGGTATCAACTGTGGTTCTAG 1669

Chimpanzee

CACGTTGGCTTCATCTGCTACAACAGCTGCGATCCCGGGGGTATCAACTGTGGTTCTAG 1656

Human Alu (+)

TCAGCTTCCAACCCTTCTGCAGCCTGTGACTCAGCTGCCAAGTCAGGTTACCCACAGCT 2038

Human Alu (-)

TCAGCTTCCAACCCTTCTGCAGCCTGTGACTCAGCTGCCAAGTCAGGTTACCCACAGCT 1729

Chimpanzee

TCAGCTTCCAACCCTTCTGCAGCCTGTGACTCAGCTGCCAAGTCAGGTTACCCACAGCT 1716

Human Alu (+)

CCTACAACCAGCAGTTCAGTCCATGGGAATACCAGCTAACCTTGGACAAGCTGCTGAGGT 2098

Human Alu (-)

CCTACAACCAGCAGTTCAGTCCATGGGAATACCAGCTAACCTTGGACAAGCTGCTGAGGT 1789

Chimpanzee

CCTACAACCAGCAGTTCAGTCCATGGGAATACCAGCTAACCTTGGACAAGCTGCTGAGGT 1776

Human Alu (+)

TCCACTTTCCTCTGGAGATGTTCTGTACCAG 2129

Human Alu (-)

TCCACTTTCCTCTGGAGATGTTCTGTACCAG 1820

Chimpanzee

TCCACTTTCCTCTGGAGATGTTCTGTACCAG 1807

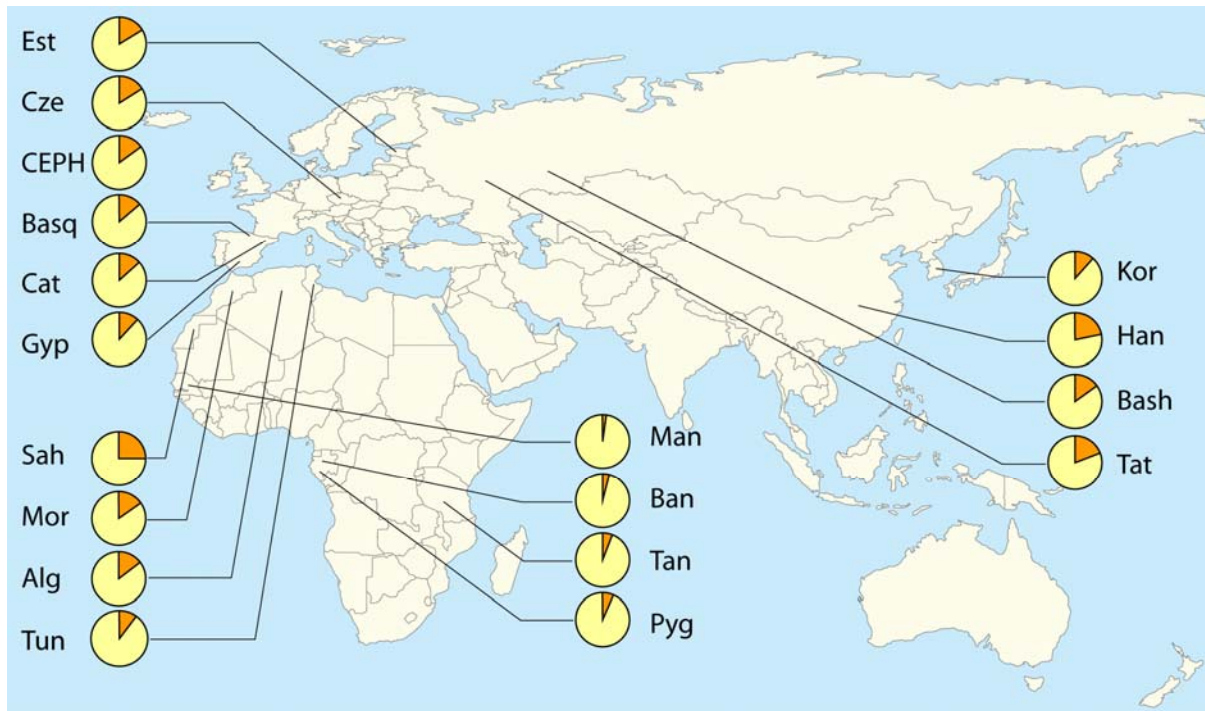

**Supp Figure S3.** Global map of the allele frequencies of the *WNK1 AluYb8* insertion in studied human population samples from Eurasia and Africa. Pie charts represent the allele frequency of *AluYb8* insertion (orange sector). Lines drawn from the pies point to the geographic affiliation of the respective study population.

Est, Estonians; Cze, Czech; CEPH, CEPH (Utah) families with ancestry from Northern and Western Europe; Basq, Basque; Cat, Catalans; Gyp, Spanish Gypsies; Sah, Saharawi; Mor, Moroccans; Alg, Algerians; Tun, Tunisians; Man, Mandenkalu; Ban, Gabon Bantus; Tan, Tanzanians; Pyg, Gabon Pygmies; Kor, Koreans; Han, Chinese Han; Bash, Bashkir; Tat, Tatars.

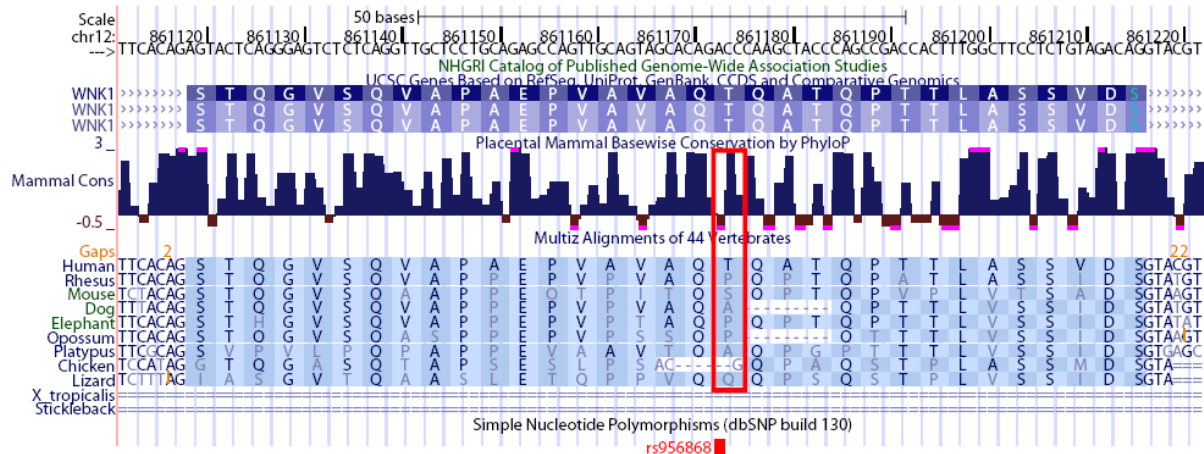

**Supp. Figure S4.** Amino acid alignment of the *WNK1* exon 13 among vertebrates. Snapshot from UCSC Genome Browser (<http://genome.ucsc.edu/>; version NCBI36/hg18, Human March 2006) showing the human peptide sequence coded by the *WNK1* exon 13 in comparison to the orthologous region in other species. Red rectangle highlights the human variable position rs956868 coding for two alternative amino acids Proline or Threonine, and exhibiting low evolutionary conservation among vertebrates. The reference sequence of the hg18 (March 2006) carries the minor allele coding for the Threonine (T).

P – proline, S – Serine, A – Alanine, Q – Glutamine, G – Glycine

**Supp. Table S1. Characteristics of the *WNK1* (12p13.33; Ensembl ID: ENSG0000060237) and *WNK4* (17q21.31; Ensembl ID: ENSG00000126562) non-coding regions selected for polymorphism screening**

| No.                | <i>WNK4/WNK1</i><br>CNS regions | Start <sup>a</sup><br>position | End <sup>a</sup><br>position | Sequence<br>type | CNR<br>length<br>(bp) | Rn% <sup>b</sup> | Mm% <sup>c</sup> | DHPLC<br>detected<br>variations;<br>rs | DGGE<br>detected<br>variations;<br>rs | Variation<br>position<br>(dbSNP<br>build130) | Reason for exclusion                               |
|--------------------|---------------------------------|--------------------------------|------------------------------|------------------|-----------------------|------------------|------------------|----------------------------------------|---------------------------------------|----------------------------------------------|----------------------------------------------------|
| <b><i>WNK4</i></b> |                                 |                                |                              |                  |                       |                  |                  |                                        |                                       |                                              |                                                    |
| 1                  | 33_WNK4_44                      | 38188209                       | 38188301                     | non-coding       | 93                    | 70.3             | 69.8             | ND                                     | none                                  | -                                            | two different Tm melting points for DHPLC          |
| 2                  | 33_WNK4_62                      | 38193583                       | 38193673                     | non-coding       | 91                    | 68               | 70.3             | none                                   | none                                  | -                                            |                                                    |
| 3                  | 33_WNK4_92                      | 38202314                       | 38202452                     | UTR              | 139                   | 72.6             | 72.7             | none                                   | none                                  | -                                            |                                                    |
| 4                  | 33_WNK4_97                      | 38202700                       | 38202870                     | non-coding       | 171                   | 80.7             | 75.4             | A/c; novel                             | none                                  | 38202858                                     |                                                    |
| 5                  | 33_WNK4_32                      | 38186084                       | 38186188                     | non-coding       | 105                   | 77.5             | 74.8             | ND                                     | ND                                    | -                                            | inappropriate primer Tm                            |
| 6                  | 33_WNK4_89                      | 38202123                       | 38202229                     | non-coding       | 107                   | 82.4             | 80.6             | ND                                     | ND                                    | -                                            | inappropriate primer Tm                            |
| 7                  | 33_WNK4_91                      | 38202233                       | 38202312                     | UTR              | 80                    | 80.5             | 79.5             | none                                   | ND                                    | -                                            | two different Tm melting points for DGGE           |
| 8                  | 33_WNK4_100                     | 38202944                       | 38203178                     | non-coding       | 235                   | 79.8             | 85.8             | none                                   | ND                                    | -                                            | two different Tm melting points for DGGE           |
| 9                  | 33_WNK4_120                     | 38210504                       | 38210693                     | non-coding       | 190                   | 82.8             | 74.9             | none                                   | ND                                    | -                                            | two different Tm melting points for DGGE           |
| 10                 | 33_WNK4_122                     | 38210713                       | 38210829                     | non-coding       | 117                   | 74.5             | 74.9             | none                                   | ND                                    | -                                            | two different Tm melting points for DGGE           |
| 11                 | 33_WNK4_127                     | 38211778                       | 38211946                     | non-coding       | 169                   | 75.6             | 74.3             | none                                   | ND                                    | -                                            | inappropriate primer Tm for DGGE                   |
| <b><i>WNK1</i></b> |                                 |                                |                              |                  |                       |                  |                  |                                        |                                       |                                              |                                                    |
| 12                 | 34_WNK1_90                      | 831113                         | 831231                       | non-coding       | 119                   | 85.8             | 93.4             | none                                   | none                                  | -                                            |                                                    |
| 13                 | 34_WNK1_139                     | 846970                         | 847070                       | non-coding       | 101                   | 87.6             | 71.6             | none                                   | none                                  | -                                            |                                                    |
| 14                 | 34_WNK1_155                     | 858084                         | 858176                       | non-coding       | 93                    | 69.9             | 80.6             | <i>AluYb8</i> ;<br>novel               | <i>AluYb8</i> ;<br>novel              | 858212                                       |                                                    |
| 15                 | 34_WNK1_167                     | 860427                         | 860561                       | non-coding       | 135                   | 79.5             | 79.4             | ND                                     | none                                  | -                                            | two different Tm melting points for DHPLC          |
| 16                 | 34_WNK1_168                     | 860562                         | 860692                       | non-coding       | 131                   | 79.5             | 79.4             | none                                   | none                                  | -                                            |                                                    |
| 17                 | 34_WNK1_208                     | 877345                         | 877471                       | non-coding       | 127                   | 75               | 73.3             | none                                   | none                                  | -                                            |                                                    |
| 18                 | 34_WNK1_222                     | 883173                         | 883364                       | non-coding       | 192                   | 72.7             | 76.1             | A/g;<br>rs10849582                     | none                                  | 883437                                       |                                                    |
| 19                 | 34_WNK1_227                     | 883843                         | 883984                       | non-coding       | 142                   | 78.5             | 76.6             | none                                   | none                                  | -                                            |                                                    |
| 20                 | 34_WNK1_250                     | 889267                         | 889379                       | UTR              | 113                   | 77               | 75.7             | A/g; novel                             | none                                  | 889252                                       |                                                    |
| 21                 | 34_WNK1_12                      | 731433                         | 731594                       | non-coding       | 162                   | 77.3             | 79               | ND                                     | ND                                    | -                                            | two different Tm melting points for DHPLC and DGGE |
| 22                 | 34_WNK1_37                      | 756329                         | 756526                       | non-coding       | 198                   | 75.1             | 75.5             | ND                                     | none                                  | -                                            | genome test negative for DHPLC                     |
| 23                 | 34_WNK1_51                      | 789691                         | 789890                       | non-coding       | 200                   | 74.1             | 75.4             | ND                                     | ND                                    | -                                            | genome test negative for DHPLC                     |



| No. | <i>WNK4/WNK1</i><br>CNS regions | Start <sup>a</sup><br>position | End <sup>a</sup><br>position | Sequence<br>type | CNR<br>length<br>(bp) | Rn% <sup>b</sup> | Mm% <sup>c</sup> | DHPLC<br>detected<br>variations;<br>rs | DGGE<br>detected<br>variations;<br>rs | Variation<br>position<br>(dbSNP<br>build130) | Reason for exclusion                               |
|-----|---------------------------------|--------------------------------|------------------------------|------------------|-----------------------|------------------|------------------|----------------------------------------|---------------------------------------|----------------------------------------------|----------------------------------------------------|
| 24  | 34_WNK1_53                      | 790344                         | 790469                       | non-coding       | 126                   | 92.6             | 96.2             | G/a;<br>rs36092349                     | ND                                    | 790218                                       | two different Tm melting points for DGGE           |
| 25  | 34_WNK1_63                      | 808723                         | 808848                       | non-coding       | 126                   | 72.6             | 0                | C/t;<br>rs72648627                     | ND                                    | 808848                                       | two different Tm melting points for DGGE           |
| 26  | 34_WNK1_67                      | 809338                         | 809429                       | non-coding       | 92                    | 0                | 70.8             | ND                                     | ND                                    | -                                            | two different Tm melting points for DHPLC and DGGE |
| 27  | 34_WNK1_81                      | 826028                         | 826198                       | non-coding       | 171                   | 82.8             | 82.8             | ND                                     | none                                  | -                                            | genome test negative for DHPLC                     |
| 28  | 34_WNK1_97                      | 832069                         | 832178                       | non-coding       | 110                   | 77               | 73.7             | ND                                     | C/g;<br>rs36052085                    | 832130                                       | genome test negative for DHPLC                     |
| 29  | 34_WNK1_117                     | 841698                         | 841796                       | non-coding       | 99                    | 73.7             | 75.8             | G/a;<br>rs12825084                     | ND                                    | 841868                                       | two different Tm melting points for DGGE           |
| 30  | 34_WNK1_120                     | 842050                         | 842208                       | non-coding       | 159                   | 72.6             | 75               | ND                                     | none                                  | -                                            | genome test negative for DHPLC                     |
| 31  | 34_WNK1_146                     | 848285                         | 848553                       | non-coding       | 269                   | 87.6             | 89               | ND                                     | ND                                    | -                                            | genome test negative for DHPLC                     |
| 32  | 34_WNK1_151                     | 850776                         | 850900                       | non-coding       | 125                   | 66.9             | 69               | ND                                     | none                                  | -                                            | genome test negative for DHPLC                     |
| 33  | 34_WNK1_161                     | 858897                         | 858999                       | non-coding       | 103                   | 75               | 70.2             | ND                                     | ND                                    | -                                            | two different Tm melting points for DHPLC and DGGE |
| 34  | 34_WNK1_165                     | 860037                         | 860147                       | non-coding       | 111                   | 73.9             | 73               | none                                   | ND                                    | -                                            | two different Tm melting points for DGGE           |
| 35  | 34_WNK1_174                     | 861501                         | 861617                       | non-coding       | 117                   | 67.9             | 73.1             | ND                                     | ND                                    | -                                            | two different Tm melting points for DHPLC and DGGE |
| 36  | 34_WNK1_214                     | 880862                         | 881152                       | non-coding       | 291                   | 86.8             | 85.9             | none                                   | ND                                    | -                                            | two different Tm melting points for DGGE           |
| 37  | 34_WNK1_218                     | 882302                         | 882503                       | non-coding       | 202                   | 75.2             | 74.1             | none                                   | ND                                    | -                                            | two different Tm melting points for DGGE           |
| 38  | 34_WNK1_224                     | 883491                         | 883608                       | non-coding       | 118                   | 74.6             | 76.6             | ND                                     | none                                  | -                                            | genome test negative for DHPLC                     |
| 39  | 34_WNK1_246                     | 888231                         | 888518                       | UTR              | 288                   | 80.5             | 80.1             | none                                   | ND                                    | -                                            | inappropriate primer Tm                            |
| 40  | 34_WNK1_259                     | 890715                         | 890782                       | UTR              | 68                    | 89.4             | 85.3             | ND                                     | ND                                    | -                                            | two different Tm melting points for DHPLC and DGGE |

<sup>a</sup> Start and end positions of the non-coding regions according to Human Genome March 2006 (NCBI Build 36/hg18) assembly.

<sup>b</sup> Sequence identity with *Rattus norvegicus*.

<sup>c</sup> Sequence identity with *Mus musculus*.

CNR - conserved non-coding region; ND - not done

**Supp. Table S2. Polymorphism screening primers for DHPLC**

| No.                | <i>WNK4</i> / <i>WNK1</i> CNS regions | DHPLC forward primer 5'-3' | DHPLC reverse primer 5'-3' | PCR product (bp) | DHPLC T <sub>m</sub> |
|--------------------|---------------------------------------|----------------------------|----------------------------|------------------|----------------------|
| <b><u>WNK4</u></b> |                                       |                            |                            |                  |                      |
| 2                  | 33_WNK4_62                            | TGACCTATCTCCCTCCTTGTGAA    | ATGACTGTCAGAGCAGACACTGG    | 323              | 60°                  |
| 3                  | 33_WNK4_92                            | CACCTTGAGGTTTCTTCATCAC     | GCTGCTAATGTGGTGTGAGCATA    | 395              | 60°                  |
| 4                  | 33_WNK4_97                            | CACCACATTAGCAGCAACCAA      | TCTGTCCTTACCCACAAGAACA     | 398              | 60°                  |
| 7                  | 33_WNK4_91                            | GATGTTGGCAGGATGGTGAG       | ATGAAGATGGTAGGCAGCAGAAC    | 354              | 61°                  |
| 8                  | 33_WNK4_100                           | CTTGTCTTTCACCCTTCATCCAC    | CTGTGCAGTGTGTTGAGCCTACAG   | 383              | 60°                  |
| 9                  | 33_WNK4_120                           | CCTAGGTTAGGTGATACTCATGG    | GCAGCATCTGGCCATAGAATAA     | 385              | 58°                  |
| 10                 | 33_WNK4_122                           | CCTGAATTGCCAGCATACTATC     | TCTCTTAGGATCCTCCCATCTCC    | 378              | 56°                  |
| 11                 | 33_WNK4_127                           | TTGCTTGAACCTGGAAGGTGTA     | GGTAGAGGTAGAGAAACCTCCATCTG | 372              | 60°                  |
| <b><u>WNK1</u></b> |                                       |                            |                            |                  |                      |
| 12                 | 34_WNK1_90                            | GTCTGACTTTGATGTCTGCCTTC    | CCTCCTCACACAGAATACACCAT    | 381              | 55°                  |
| 13                 | 34_WNK1_139                           | GGCCTCTAACATATCACAGGGTAA   | ATGCACAACCTGGGTAGTTCTGTG   | 429              | 54°                  |
| 14                 | 34_WNK1_155                           | GGGTAACCAACCCTTGAAGTAGG    | GGGTACTTCTCAAGTGATTAGGAGGA | 353              | 56°                  |
| 16                 | 34_WNK1_168                           | CCAGGAGGGAGTTTAGCACAAG     | AATGATTGCTGAGAGCACAGGAG    | 399              | 58°                  |
| 17                 | 34_WNK1_208                           | TGTCTCCAGCTGTATGTGACCTG    | CACCGTGCCTAACCAATGACT      | 486              | 54°                  |
| 18                 | 34_WNK1_222                           | GGCCCTACATCCTTAGAAGTCACA   | GATCCTGTCCCACCTTCTGTTTC    | 413              | 57°                  |
| 19                 | 34_WNK1_227                           | TGTCTCACCTCCTGCTTCTCTT     | TGTCTGTACAAGCTAGGCTCAC     | 368              | 57°                  |
| 20                 | 34_WNK1_250                           | CATGTGGAAGGAAATCGTAGGTC    | ACGTCTGTTCAAGCCTAGCTCAA    | 339              | 58°                  |
| 24                 | 34_WNK1_53                            | AAGGGACGGAAGATGTGCAA       | CTCTTCACCATTATGGAGCTGGA    | 398              | 59°                  |
| 25                 | 34_WNK1_63                            | GCCTGTTTCTTGAAATGCCTA      | CAGCTACACTCTTGGCATTAACTC   | 380              | 57°                  |
| 29                 | 34_WNK1_117                           | CATGAACAGGCACATTCTACAGG    | GCTTCATGTAGGCAGTTCAGCTA    | 296              | 59°                  |
| 34                 | 34_WNK1_165                           | GTCCTGTCTCTTCTGTTGGAACC    | TGTGGGAAAGTACCCAGGTGTAG    | 348              | 60°                  |
| 36                 | 34_WNK1_214                           | CTTGATTGGTAAGGAGGGCAAAC    | GCCCAAACCTTCTGAGGGTAACA    | 487              | 59°                  |
| 37                 | 34_WNK1_218                           | TCTGATGAGTCAGTGCCTACCTG    | GGAGCCAATCCATTTCTAATGC     | 373              | 58°                  |
| 39                 | 34_WNK1_246                           | GGAAGTGCCTCCTTGCAGAAT      | AGAGCTCCACCCACTCGAAATTA    | 452              | 60°                  |

**Supp. Table S3. Polymorphism screening primers for DGGE**

| No.                | <i>WNK4</i> / <i>WNK1</i><br>CNS regions | DGGE forward primer 5'-3'                                                           | DGGE reverse primer 5'-3'                                                            | PCR<br>product<br>(bp) |
|--------------------|------------------------------------------|-------------------------------------------------------------------------------------|--------------------------------------------------------------------------------------|------------------------|
| <b><u>WNK4</u></b> |                                          |                                                                                     |                                                                                      |                        |
| 1                  | 33_WNK4_44                               | CGCCCCCGCGCCCCGCGCCCCGCCCCGCCCCCGCCC<br>GCGCCCCCGCGGCAAGTAATCCCATTAAC CCCA          | ATAGAAGCGGACGATGTTGGGGT                                                              | 278                    |
| 2                  | 33_WNK4_62                               | CGCCCCCGCGCCCCGCGCCCCGCCCCGCCCCCGCCC<br>GTTTTTTTTTTGACCTATCTCCCTCCTTGTGAAA          | GCCGACCCCAACTTGTACCAGAACAT                                                           | 322                    |
| 3                  | 33_WNK4_92                               | GGGCCCCGGGCCACCTTGGAGGTTTCTTCATCAC                                                  | CGCCCCCGCGCCCCGCGCCCCGCCCCGCCCCCGCCC<br>GTTTTTTTTTTGATTGCTTAGTGGTTGACTCTTGGC         | 374                    |
| 4                  | 33_WNK4_97                               | AACGCCGTGAATCCATATGCCAT                                                             | CGCCCCCGCGCCCCGCGCCCCGCCCCGCCCCCGCCC<br>GTTTTGAACATACTGTA ACTCTACTGC                 | 384                    |
| <b><u>WNK1</u></b> |                                          |                                                                                     |                                                                                      |                        |
| 12                 | 34_WNK1_90                               | TTCCTTATGCTGTGGGCTGATGTA                                                            | CGCCCCCGCGCCCCGCGCCCCGCCCCGCCCCCGCCC<br>GGCATTCTCAAGTTAACA                           | 341                    |
| 13                 | 34_WNK1_139                              | CGCCCCCGCGCCCCGCGCCCCGCCCCGCCCCCGCCC<br>GTTTTTTTTTTTTTTTTTAGGGAAAGTTAGTTCAATAGTT    | CCGAATGAAATCAATCTGTGGGCTCT                                                           | 329                    |
| 14                 | 34_WNK1_155                              | ATTGCAGAAATGAAGATC                                                                  | CGCCCCCGCGCCCCGCGCCCCGCCCCGCCCCCGCCC<br>GTTTTTTTTTTTTTTTTTACAGG GTACTTCTCAAGTGATTAGG | 379                    |
| 15                 | 34_WNK1_167                              | CGCCCCCGCGCCCCGCGCCCCGCCCCGCCCCCGCCC<br>GTTTTTTTTTTTTTTTTTTTTT CACTACATCCTCCCAGCAAG | AGGACCCACATTGGCATTTCATTC                                                             | 263                    |
| 16                 | 34_WNK1_168                              | CGCCCCCGCGCCCCGCGCCCCGCCCCGCCCCCGCCC<br>GCGTATATATGTAATTGGACAAC                     | AGCCAGCATCTTACCAAGAGTGT                                                              | 433                    |
| 17                 | 34_WNK1_208                              | CGCCCCCGCGCCCCGCGCCCCGCCCCGCCCCCGCCC<br>GTTTTTTTTTTTTTTAGACTTAGTGAATACAATGGC        | GGCCGGTTGCAATTATGACTAAGTCA                                                           | 248                    |
| 18                 | 34_WNK1_222                              | CGGGCGTGGTATTACCCTGTTGTTCAA                                                         | CGCCCCCGCGCCCCGCGCCCCGCCCCGCCCCCGCCC<br>GGGCTATTATATTCCACATCCC                       | 415                    |
| 19                 | 34_WNK1_227                              | TGTCTCACCTCCTGCTTCTCTT                                                              | CGCCCCCGCGCCCCGCGCCCCGCCCCGCCCCCGCCC<br>GTTTTTTTTTTTGAATAGGATACAGAGATAGATGG          | 328                    |
| 20                 | 34_WNK1_250                              | CGCCCCCGCGCCCCGCGCCCCGCCCCGCCCCCGCCC<br>GTTTTTTTTTTTCAGTGGTTATGCCAAAGGGAAAT         | GGGCCACCATCTTTTAAAGTTGTCAA                                                           | 245                    |
| 22                 | 34_WNK1_37                               | GTGAACTATAGAGAATTGACC                                                               | CGCCCCCGCGCCCCGCGCCCCGCCCCGCCCCCGCCC<br>GTTTTTTTTTTTTTTTTTTTTTGCACAGATGCTGACTAATTTT  | 324                    |

| No. | <i>WNK4/WNK1</i><br>CNS regions | DGGE forward primer 5'-3'                                                         | DGGE reverse primer 5'-3'                                                          | PCR<br>product<br>(bp) |
|-----|---------------------------------|-----------------------------------------------------------------------------------|------------------------------------------------------------------------------------|------------------------|
| 27  | 34_WNK1_81                      | GGTTCCAATGGGATCATAGGGT                                                            | CGCCCGCCGCGCCCCGCGCCCGGCCCGCCGCCCCCGCC<br>GTTTTTTTTTTTTTTTTTCAGTAAAAAGGTAGGGTGAATT | 334                    |
| 28  | 34_WNK1_97                      | AGTGGAATGAGAGGGCTGTAT                                                             | CGCCCGCCGCGCCCCGCGCCCGGCCCGCCGCCCCCGCC<br>GGGGACATGTAATAGAAAGCTG                   | 340                    |
| 30  | 34_WNK1_120                     | CGCCCGCCGCGCCCCGCGCCCGGCCCGCCGCCCCCGCC<br>GTTTTTTTTTTTTTTTTTGGCGAGAAGAGTTTTTCAAAA | TCCAACACAGACTTTAAAAGGCA                                                            | 283                    |
| 32  | 34_WNK1_151                     | TCATCTCCCAACCCATACAA                                                              | CGCCCGCCGCGCCCCGCGCCCGGCCCGCCGCCCCCGCC<br>GTTTTTTTTTTGAGATTTTTCTGAAACACAG          | 264                    |
| 38  | 34_WNK1_224                     | CCGGCCCTACTGTGGTGGGGTTGCTAATGCAT                                                  | CGCCCGCCGCGCCCCGCGCCCGGCCCGCCGCCCCCGCC<br>GCAGATATAGTTCTACAGAATG                   | 342                    |

**Supp. Table S4. Sequences of oligonucleotide primers and probes used in PCR and RT-PCR reactions**

| Primer ID                                                        | Sequence 5' - 3'         | 5' modification                  | 3' modification     |
|------------------------------------------------------------------|--------------------------|----------------------------------|---------------------|
| <b>A. Amplification of genomic area covering exons 10 and 11</b> |                          |                                  |                     |
| WNK1_Seq1_F                                                      | TGGGGTGAGGGAGATAATTGGGTG |                                  |                     |
| WNK1_Seq_R                                                       | ACTCTGTGGTGCCCTCTTTTGCT  |                                  |                     |
| <b>B. Sequencing primers</b>                                     |                          |                                  |                     |
| WNK1_Seq3_F                                                      | TCAGGTAGTGGAGAGGGATGATTG |                                  |                     |
| WNK1_Seq4_F                                                      | ACCCCTTGTCTATGGAAGGGTCC  |                                  |                     |
| WNK1_Seq5_F                                                      | CCTTCCAGTGGGAGAGCCGC     |                                  |                     |
| WNK1_Alu_F                                                       | CGGCCTCCCAAAGTGCTGGG     |                                  |                     |
| <b>C. RT-PCR primers and probes</b>                              |                          |                                  |                     |
| WNK1_Exon10_F                                                    | CCACAAGTCTTGCCTCAAGTATCA |                                  |                     |
| WNK1_Exon12_R                                                    | GGAAGAGGGAGCAATATTTGAATC |                                  |                     |
| WNK1_Exon13_R                                                    | TGCAGGAGCAACCTGAGAGA     |                                  |                     |
| Ex-11+12_probe                                                   | TGGAAAACAGGGCTTC         | <sup>a</sup> 6-FAM <sup>TM</sup> | <sup>b</sup> MGBNFQ |
| Ex-11-12_probe                                                   | CTGGAAAACAGAGTACTC       | 6-FAM <sup>TM</sup>              | MGBNFQ              |

<sup>a</sup> Phosphoramidite<sup>b</sup> Minor groove binding non-fluorescent quencher

**Supp. Table S5. Characteristics of the individuals used for *WNKI* expression profiling in leucocytes**

| Genotype | Gender | Age | SBP | DBP | BMI  |
|----------|--------|-----|-----|-----|------|
| -/-      | female | 40  | 100 | 60  | 23.0 |
|          | female | 36  | 105 | 70  | 21.3 |
|          | female | 46  | 118 | 83  | 23.0 |
| Alu/-    | female | 51  | 118 | 75  | 27.0 |
|          | female | 43  | 113 | 73  | 25.6 |
|          | female | 47  | 127 | 82  | 20.8 |
| Alu/Alu  | female | 35  | 156 | 100 | 21.8 |
|          | female | 64  | 190 | 110 | 31.6 |
|          | female | 57  | 165 | 100 | 26.3 |

SBP – Systolic Blood Pressure; DBP – Diastolic Blood Pressure;  
 BMI – Body Mass Index

**Supp. Table S6. Polymorphisms detected in screened conserved non-coding regions of human *WNK1* and *WNK4* genes**

| <u>Analyzed regions<sup>a</sup></u> |           |                         | <u>Detected variants</u>             |                      |                               |                              |                                    |
|-------------------------------------|-----------|-------------------------|--------------------------------------|----------------------|-------------------------------|------------------------------|------------------------------------|
| Gene                                | Location  | Length of fragment (bp) | Position of the variant <sup>b</sup> | Alleles <sup>c</sup> | HYPEST (hom/het) <sup>d</sup> | CADCZ (hom/het) <sup>d</sup> | Validation/ rs-number <sup>b</sup> |
| WNK1                                | Intron 1  | 398bp                   | Chr.12;<br>790218                    | G/a                  | 1/3                           | 0/1                          | rs36092349                         |
| WNK1                                | Intron 3  | 380bp                   | Chr.12;<br>808848                    | C/t                  | 0/1                           | 0/0                          | rs72648627                         |
| WNK1                                | Intron 4  | 340bp                   | Chr.12;<br>832130                    | C/g                  | na/6                          | na/6                         | rs36052085                         |
| WNK1                                | Intron 8  | 296bp                   | Chr.12;<br>841868                    | G/a                  | 0/0                           | 0/2                          | rs12825084                         |
| WNK1                                | Intron 10 | 353bp                   | Chr.12;<br>858212                    | D/i                  | 1/7                           | 3/9                          | novel                              |
| WNK1                                | Intron 26 | 413bp                   | Chr.12;<br>883437                    | A/g                  | 0/0                           | 0/4                          | rs10849582                         |
| WNK1                                | 3'UTR     | 339bp                   | Chr.12;<br>889252                    | A/g                  | 0/1                           | 0/0                          | novel                              |
| WNK4                                | 5'UTR     | 398bp                   | Chr.17;<br>38202858                  | A/c                  | 0/0                           | 0/1                          | novel                              |

<sup>a</sup> Details of the analyzed regions and conditions of the DHPLC/DGGE assays are given in Supp. Table S1.

<sup>b</sup> Positions of the variants and rs-numbers of the validated SNPs according to the dbSNP build 130; Human Genome March 2006.

<sup>c</sup> Major (capital letter) and minor (lower case letter) alleles according to the coding strand.

<sup>d</sup> Number of homozygotes/ heterozygotes (hom/het) of each identified polymorphism among the screened HYPEST (n=22) and CADCZ (n=24) patients.

D/i – deletion/insertion variant of *WNK1* *AluYb8*

na – not applicable as DGGE method was incapable to distinguish CC and GG homozygotes

**Supp. Table S7. Allele frequencies of the *WNKI AluYb8* insertion in general human population samples**

| Region       | Population             | Number of individuals |                    |                  | total | <i>AluYb8</i>    |
|--------------|------------------------|-----------------------|--------------------|------------------|-------|------------------|
|              |                        | Alu/Alu <sup>a</sup>  | Alu/- <sup>b</sup> | -/- <sup>c</sup> |       | allele frequency |
| Europe       | Estonians              | 4                     | 25                 | 71               | 100   | 16.5%            |
|              | Czechs                 | 1                     | 14                 | 35               | 50    | 16.0%            |
|              | CEPH (Utah) families   | 2                     | 5                  | 23               | 30    | 15.0%            |
|              | Basques                | 0                     | 14                 | 36               | 50    | 14.0%            |
|              | Catalans               | 0                     | 11                 | 30               | 41    | 13.4%            |
|              | Spain Gypsies          | 0                     | 12                 | 38               | 50    | 12.0%            |
| Asia         | Chinese Han            | 2                     | 7                  | 16               | 25    | 22.0%            |
|              | Koreans                | 1                     | 8                  | 34               | 43    | 11.6%            |
|              | Tatars                 | 1                     | 16                 | 30               | 47    | 19.1%            |
|              | Bashkirs               | 2                     | 10                 | 35               | 47    | 14.9%            |
| North-Africa | Moroccans <sup>d</sup> | 2                     | 22                 | 60               | 84    | 15.5%            |
|              | Saharawi               | 6                     | 13                 | 31               | 50    | 25.0%            |
|              | Tunisians              | 1                     | 8                  | 39               | 48    | 10.4%            |
|              | Algerians              | 0                     | 14                 | 34               | 48    | 14.6%            |
| Sub-Saharan  | Mandenkalu             | 0                     | 1                  | 23               | 24    | 2.1%             |
| Africa       | Tanzanians             | 0                     | 2                  | 15               | 17    | 5.9%             |
|              | Bantus                 | 0                     | 4                  | 46               | 50    | 4.0%             |
|              | Pygmies                | 0                     | 7                  | 43               | 50    | 7.0%             |

<sup>a</sup> Homozygotes and <sup>b</sup> Heterozygotes for the *WNKI AluYb8* insertion.

<sup>c</sup> Wild-type genotype without the *WNKI AluYb8* insertion.

<sup>d</sup> Samples were collected from five different cities in Morocco (Oujda, Casablanca, Rabat, Chefchaouen, Nador).

Mandenkalu and Chinese Han samples were purchased from the HGDP-CEPH Human Genome Diversity Cell Line Panel (<http://www.cephb.fr/HGDP-CEPH-Panel/>). Korean samples were kindly shared by Dr. Woo Chul Moon (Good-Gene Inc. Seoul, Korea).



**Supp. Table S8. Association testing of the *WNK1* intron 10 *AluYb8* with hypertension**

| Sample                                                                         | Sample size: total and stratified by |                    | <i>AluYb8</i> allele |          | Association testing <sup>a</sup> |                       |
|--------------------------------------------------------------------------------|--------------------------------------|--------------------|----------------------|----------|----------------------------------|-----------------------|
|                                                                                | genotype (Alu/Alu; Alu/-; -/-)       |                    | frequency (%)        |          | OR (CI 95%)                      | P-value               |
|                                                                                | Cases                                | Controls           | Cases                | Controls |                                  |                       |
| HYPEST <sup>b</sup> : essential hypertension/ normotensive controls            |                                      |                    |                      |          |                                  |                       |
| all                                                                            | 673 (21/197/455)                     | 601 (13/148/440)   | 17.70                | 14.51    | 1.24 (0.91, 1.69)                | 1.66x10 <sup>-1</sup> |
| women                                                                          | 445 (16/140/289)                     | 439 (11/109/319)   | 19.28                | 14.97    | 1.17 (0.81, 1.69)                | 4.03x10 <sup>-1</sup> |
| men                                                                            | 228 (5/57/166)                       | 162 (2/39/121)     | 14.63                | 13.27    | 1.42 (0.79, 2.52)                | 2.38x10 <sup>-1</sup> |
| CADCZ <sup>b</sup> : CAD patients with hypertension/ normotensive controls     |                                      |                    |                      |          |                                  |                       |
| all                                                                            | 266 (10/71/185)                      | 480 (9/129/342)    | 17.11                | 15.31    | 1.23 (0.89, 1.71)                | 2.14x10 <sup>-1</sup> |
| women                                                                          | 86 (5/21/60)                         | 251 (5/61/185)     | 18.02                | 14.14    | 1.37 (0.83, 2.29)                | 2.22x10 <sup>-1</sup> |
| men                                                                            | 180 (5/50/125)                       | 229 (4/68/157)     | 16.67                | 16.60    | 1.14 (0.74, 1.75)                | 5.57x10 <sup>-1</sup> |
| BRIGHT <sup>c</sup> : extreme family based hypertension/ normotensive controls |                                      |                    |                      |          |                                  |                       |
| all                                                                            | 2242 (54/544/1644)                   | 1639 (43/391/1205) | 14.54                | 14.55    | 1.00 (0.88, 1.14)                | 9.95x10 <sup>-1</sup> |
| women                                                                          | 1320 (40/319/961)                    | 1002 (29/249/724)  | 15.11                | 15.32    | 0.99 (0.84, 1.16)                | 8.85x10 <sup>-1</sup> |
| men                                                                            | 922 (14/225/683)                     | 637 (14/142/481)   | 13.72                | 13.34    | 1.02 (0.83, 1.26)                | 8.66x10 <sup>-1</sup> |

<sup>a</sup> Logistic regression (additive model, age and gender as covariates) were used to test association with HYP.

<sup>b</sup> Cases: subjects under antihypertensive treatment or untreated subjects SBP  $\geq$ 160 mmHg and/or DBP  $\geq$ 100 mmHg; Controls: subjects with SBP  $\leq$ 140 mmHg and DBP  $\leq$ 90 mmHg, receiving no antihypertensive medication.

<sup>c</sup> Cases: patients originating from severely hypertensive families, under antihypertensive treatment and with BP readings  $\geq$ 150/100 mmHg based on one reading or  $\geq$ 145/95 mmHg based on the mean of three readings; Controls: normotensive subjects with BP <140/90 mmHg, receiving no antihypertensive medication.

Alu/-, Alu/Alu *WNK1 AluYb8* hetero- and homozygote carriers; -/- wild-type homozygotes; CAD, coronary artery disease; OR, odds ratio; CI, confidence interval

**Supp. Table S9. Linkage disequilibrium ( $r^2$ ) between the *WNKI AluYb8* and common SNPs in the *WNKI* gene previously reported in the BRIGHT study (data from Newhouse et al., 2009)**

| SNP           | Location  | Position <sup>a</sup> | MAF <sup>b</sup> | $r^2$          |
|---------------|-----------|-----------------------|------------------|----------------|
| rs7137188     | 5'        | 724592                | 0.48             | 0.0003         |
| rs1468326     | 5'        | 727762                | 0.11             | 0.0029         |
| rs3088353     | 5'        | 732901                | 0.46             | 0.1908         |
| rs11064519    | Intron 1  | 741472                | 0.34             | 0.0044         |
| rs2369402     | Intron 1  | 748925                | 0.21             | 0.0476         |
| rs2107612     | Intron 1  | 758581                | 0.27             | 0.0723         |
| rs2107613     | Intron 1  | 758689                | 0.23             | 0.0543         |
| rs11608756    | Intron 1  | 760094                | 0.39             | 0.2561         |
| rs11064524    | Intron 1  | 760163                | 0.25             | 0.0423         |
| rs11064527    | Intron 1  | 761286                | 0.16             | <b>0.8216*</b> |
| rs11064536    | Intron 1  | 775843                | 0.17             | 0.0345         |
| rs765250      | Intron 1  | 778544                | 0.31             | 0.0800         |
| rs12314329    | Intron 1  | 779992                | 0.08             | 0.0176         |
| rs11611246    | Intron 4  | 809741                | 0.22             | 0.0294         |
| rs6489756     | Intron 4  | 834767                | 0.47             | 0.1800         |
| rs12816718    | Intron 6  | 840061                | 0.15             | <b>0.9213*</b> |
| rs2286007     | Exon 8    | 841552                | 0.07             | 0.0140         |
| rs11611231    | Intron 8  | 844587                | 0.10             | 0.0095         |
| rs4980973     | Intron 9  | 853307                | 0.13             | 0.0248         |
| rs4980974     | Intron 9  | 855289                | 0.44             | 0.1277         |
| <i>AluYb8</i> | Intron 10 | 858213                | 0.15             | 1              |
| rs880054      | Intron 10 | 858819                | 0.41             | 0.1286         |
| rs956868      | Exon 13   | 861173                | 0.14             | <b>0.9753*</b> |
| rs953361      | Intron 22 | 872068                | 0.40             | 0.0878         |
| rs2301880     | Intron 23 | 874098                | 0.24             | 0.0602         |
| rs2286026     | Intron 26 | 885434                | 0.41             | 0.1247         |
| rs2286028     | Intron 26 | 885730                | 0.20             | 0.0371         |
| rs2277869     | Intron 26 | 887171                | 0.16             | 0.0233         |
| rs11571461    | 3'        | 896580                | 0.07             | 0.0150         |

<sup>a</sup> Positions of the SNPs according to the dbSNP build 130; Human Genome March 2006.

<sup>b</sup> MAF, minor allele frequency

\*  $r^2 > 0.8$

**Table reference:**

Newhouse S, Farrall M, Wallace C, Hoti M, Burke B, Howard P, Onipinla A, Lee K, Shaw-Hawkins S, Dobson R, Brown M, Samani NJ, Dominiczak AF, Connell JM, Lathrop GM, Kooner J, Chambers J, Elliott P, Clarke R, Collins R, Laan M, Org E, Juhanson P, Veldre G,

Viigimaa M, Eyheramendy S, Cappuccio FP, Ji C, Iacone R, Strazzullo P, Kumari M, Marmot M, Brunner E, Caulfield M, Munroe PB. 2009. Polymorphisms in the WNK1 gene are associated with blood pressure variation and urinary potassium excretion. *PLoS One* 4: e5003.

**Supp. Table S10. Association of the *WNK1 AluYb8* and SNPs rs11064527, rs12816718, rs956868 with blood pressure in the BRIGHT**

| Trait | rs11064527 (Intron 1)  |                 | rs12816718 (Intron 6) |                 | <i>AluYb8</i> indel (Intron 10) |                 | rs956868 (Exon 13)<br>Thr1316Pro (NP_001171914) |                 |                       |
|-------|------------------------|-----------------|-----------------------|-----------------|---------------------------------|-----------------|-------------------------------------------------|-----------------|-----------------------|
|       | Beta (SE) <sup>b</sup> | <i>P</i> -value | Beta (SE)             | <i>P</i> -value | Beta (SE)                       | <i>P</i> -value | Beta (SE)                                       | <i>P</i> -value |                       |
| SBP   | all                    | 1.16 (0.49)     | 1.67x10 <sup>-2</sup> | 1.15 (0.50)     | 2.18x10 <sup>-2</sup>           | 1.50 (0.51)     | 3.01x10 <sup>-3</sup>                           | 1.47 (0.52)     | 4.90x10 <sup>-3</sup> |
|       | women                  | 1.26 (0.67)     | 5.83x10 <sup>-2</sup> | 1.22 (0.68)     | 7.55x10 <sup>-2</sup>           | 1.60 (0.68)     | 1.91x10 <sup>-2</sup>                           | 1.48 (0.70)     | 3.46x10 <sup>-2</sup> |
|       | men                    | 1.00 (0.67)     | 1.40x10 <sup>-1</sup> | 1.07 (0.70)     | 1.27x10 <sup>-1</sup>           | 1.27 (0.73)     | 8.12x10 <sup>-2</sup>                           | 1.41 (0.75)     | 6.11x10 <sup>-2</sup> |
| DBP   | all                    | 0.61 (0.34)     | 7.64x10 <sup>-2</sup> | 0.52 (0.35)     | 1.40x10 <sup>-1</sup>           | 0.78 (0.36)     | 2.99x10 <sup>-2</sup>                           | 0.72 (0.37)     | 5.15x10 <sup>-2</sup> |
|       | women                  | 1.07 (0.46)     | 1.89x10 <sup>-2</sup> | 0.93 (0.47)     | 4.98x10 <sup>-2</sup>           | 1.22 (0.47)     | 9.48x10 <sup>-3</sup>                           | 1.06 (0.48)     | 2.88x10 <sup>-2</sup> |
|       | men                    | -0.14 (0.51)    | 7.85x10 <sup>-1</sup> | -0.10 (0.52)    | 8.43x10 <sup>-1</sup>           | -0.03 (0.55)    | 9.49x10 <sup>-1</sup>                           | 0.09 (0.56)     | 8.70x10 <sup>-1</sup> |

The association testing was performed using the BRIGHT normotensive individuals (n=1421) genotyped in the current study for the *AluYb8* insertion, and in the previous study for rs11064527, rs12816718, rs956868 (Newhouse et al., 2009). Statistical analysis was identical to the conditions described in Materials and Methods for the association testing with quantitative variables, SBP and DBP (linear regression, additive model, age and gender as covariates).

SBP, DBP, systolic and diastolic blood pressure; SE, standard error
